# Supplementary material
Source: PubMed Central journal article supplement (PMC5538019)
Supplement: NIHMS879912-supplement-supplement_1.pdf [file NIHMS879912-supplement-supplement_1.pdf]

**Supplementary Table I: List of Neurocognitive Tests Categorized into Domains.**

| <b>Neurocognitive Domain</b>                | <b>Neurocognitive Tests</b>                                                                                                                                                                                                                                                                                                    |
|---------------------------------------------|--------------------------------------------------------------------------------------------------------------------------------------------------------------------------------------------------------------------------------------------------------------------------------------------------------------------------------|
| Motor Skill and Dexterity                   | Grooved Pegboard, dominant and non-dominant hand (sec)                                                                                                                                                                                                                                                                         |
| Learning and Memory                         | RAVLT SumTrials 1-5; Immediate Recall, Delayed Recall                                                                                                                                                                                                                                                                          |
| Executive Function                          | Stroop Task, Interference Trial<br>Trailmaking Test, Part B                                                                                                                                                                                                                                                                    |
| Psychomotor Speed and Attention             | CALCAP-Mean Simple Reaction time (1) and Mean Complex Reaction Time (3,4,14)<br>Symbol-Digit Modalities Test                                                                                                                                                                                                                   |
| <b>Neurocognitive Summary Score (NPZ16)</b> | Symbol-Digit Modalities Test<br>Trailmaking Test, Part A and Part B<br>Grooved Pegboard, dominant and non-dominant hand<br>RAVLT SumTrials 1-5; Interference List, Immediate Recall, Delayed Recall<br>Stroop Task (Color, Word, Interference)<br>CALCAP-Mean Simple Reaction time (1) and Mean Complex Reaction Time (3,4,14) |

Neurocognitive test scores were scored for each test using HIV-control groups (age 30-39) matched for education level as the reference group. Composite domain scores were calculated as the mean of the component z-scores only when all component scores were available. The signs for some timed tests were changed so that higher z-scores always denote better performance. Z-scores for 16 tests were used to create the cognitive summary score.

Abbreviations: RAVLT= Rey Auditory Verbal Learning Test; CALCAP= California Computerized Assessment Package  
<http://www.calcaprt.com/calcap.htm>

**Supplementary Table II: Baseline Mean CES-D and Neurocognitive Raw Scores by HIV Serostatus and Cocaine Use**

|                                           | HIV- Controls<br>(n=94) |        | HIV- Cocaine<br>(n=53) |        | HIV+ Controls<br>(n=112) |        | HIV+ Cocaine<br>(n=82) |        |
|-------------------------------------------|-------------------------|--------|------------------------|--------|--------------------------|--------|------------------------|--------|
|                                           | Mean                    | SD     | Mean                   | SD     | Mean                     | SD     | Mean                   | SD     |
| <b>CES-D (total score)</b>                | 11.09                   | 10.78  | 16.08                  | 12.75  | 12.31                    | 10.62  | 16.93                  | 12.69  |
| Stroop Task, Color Naming (sec)           | 63.78                   | 13.14  | 67.26                  | 14.74  | 68.96                    | 15.11  | 63.92                  | 13.31  |
| Stroop Task, Interference Trial (sec)     | 119.39                  | 26.67  | 131.38                 | 34.93  | 126.74                   | 32.75  | 121.9                  | 26.83  |
| Stroop Task, Word Reading (sec)           | 49.5                    | 12.99  | 50.97                  | 8.92   | 52.26                    | 12.79  | 47                     | 8.11   |
| Stroop Task, Interference Trial Errors    | 0.83                    | 1.87   | 1.38                   | 2.31   | 1.24                     | 2.85   | 1.52                   | 2.26   |
| Grooved Pegboard, dominant hand (sec)     | 75.54                   | 28.51  | 80.35                  | 17.43  | 73.23                    | 19.05  | 75.27                  | 13.76  |
| Grooved Pegboard, non-dominant hand (sec) | 81.08                   | 27.03  | 86.59                  | 18.95  | 81.76                    | 21.79  | 83.9                   | 20.02  |
| RAVLT Sum of Trials 1-5 (score)           | 48.32                   | 11.77  | 49.44                  | 10.33  | 49.88                    | 11.95  | 52.71                  | 10.16  |
| RAVLT 6 (score)                           | 5.35                    | 1.8    | 4.97                   | 2.08   | 5.26                     | 2.35   | 5.56                   | 1.82   |
| RAVLT 7 (score)                           | 8.58                    | 2.79   | 8.59                   | 3.33   | 8.6                      | 3.37   | 8.98                   | 2.81   |
| RAVLT 8 (score)                           | 7.85                    | 3.29   | 8                      | 3.31   | 8.4                      | 3.32   | 8.58                   | 3.32   |
| Symbol-Digit Modalities Test (sec)        | 47.94                   | 12.66  | 44.42                  | 13.12  | 44.73                    | 11.89  | 46.61                  | 9.61   |
| Trailmaking Test, Part A (sec)            | 28.59                   | 9.62   | 32.53                  | 10.03  | 29.46                    | 12.67  | 26.78                  | 9.07   |
| Trailmaking Test, Part B (sec)            | 80.01                   | 49.74  | 74.03                  | 28.64  | 84.73                    | 49.31  | 66.22                  | 31.53  |
| CalCAP MSRT1 (msec)                       | 383.89                  | 129.77 | 424.3                  | 231.59 | 387.13                   | 157.6  | 374.64                 | 118.59 |
| CalCAP MCRT14 (msec)                      | 615.2                   | 126.04 | 612.81                 | 121.58 | 624.68                   | 130.17 | 618.74                 | 113.45 |
| CalCAP MCRT3 (msec)                       | 421.63                  | 63.61  | 420.06                 | 58.93  | 427.28                   | 72.92  | 418.7                  | 57.21  |
| CalCAP MCRT4 (msec)                       | 539.35                  | 117.92 | 568.82                 | 104.19 | 555.43                   | 117.9  | 554.26                 | 108.26 |

Bold- two-way ANOVA,  $p = 0.03$ . Analyses included two-way ANOVA followed by pairwise t-tests between HIV- controls vs. HIV- cocaine and HIV+ controls vs. HIV+ cocaine groups. Abbreviations: CalCAP, California Computerized Assessment Package (<http://www.calcaprt.com/calcap.htm>); CES-D, Center for Epidemiological Studies Depression Scale; MCRT, mean complex reaction time; MSRT, mean simple reaction time; RAVLT, Rey-Auditory Verbal Learning Test ; SD, standard deviation.

**Supplementary Table III: Latent Class Mixed Models Parameter Estimates for CES-D Trajectories**

|                                     | <b>CES-D</b> |            |           |
|-------------------------------------|--------------|------------|-----------|
| <b>Parameter</b>                    | 3 Classes    | 4 Classes  | 5 Classes |
| Number of Participants              | 253          | 252        | 179       |
| Bayesian Information Criteria (BIC) | 8002         | 8013       | 8028      |
| Posterior probability (n)           |              |            |           |
| Class A                             | 0.85 (6)     | 0.89 (6)   | 0.94 (6)  |
| Class B                             | 0.89 (71)    | 0.92 (70)  | 0.83 (33) |
| Class C                             | 0.93 (176)   | 0.92 (171) | 0.85 (66) |
| Class D                             | -            | 0.85 (5)   | 0.77 (61) |
| Class E                             | -            | -          | 0.90 (13) |

An *a priori* requirement for latent class modeling required subjects to meet the posterior probability threshold cut-off (65%) and population threshold of  $\geq 5\%$  under their respective modeling parameters to be classified into latent classes and included in group counts for logistic regression.
